# Supplementary material for: Covalent segmented polymer networks composed of poly(2-isopropenyl-2-oxazoline) and selected aliphatic polyesters: designing biocompatible amphiphilic materials containing degradable blocks
Source: Royal Society of Chemistry journal article supplement (doi:10.1039/d3sm00948c), 2023-01-01
Supplement: d3sm00948c1.pdf [file d3sm00948c1.pdf]

## Supporting Information

### Covalent segmented polymer networks composed of poly(2-isopropenyl-2-oxazoline) and selected aliphatic polyesters: Designing biocompatible amphiphilic materials containing degradable blocks.

Bartosz Kopka<sup>a</sup>, Bartłomiej Kost<sup>a</sup>, Andrzej Pawlak<sup>a</sup>, Agata Tomaszewska<sup>b,c</sup>, Agnieszka Krupa<sup>b</sup>, Malgorzata Basko<sup>a\*</sup>

#### Table of contents:

|                                                                                                                                                                                                                                                                              |   |
|------------------------------------------------------------------------------------------------------------------------------------------------------------------------------------------------------------------------------------------------------------------------------|---|
| Figure S1. PiPOx characterization: A) SEC (H <sub>2</sub> O), B) <sup>1</sup> H NMR and C) <sup>13</sup> C NMR spectra (400 MHz, CDCl <sub>3</sub> ).....                                                                                                                    | 2 |
| Figure S2. <sup>1</sup> H NMR spectra of: A) starting and B) modified poly(lactide) diol: HOOC-PLA-COOH (400 MHz, CDCl <sub>3</sub> ).....                                                                                                                                   | 3 |
| Figure S3. <sup>1</sup> H NMR spectra of: A) starting and B) modified poly(caprolactone) diol: HOOC-PCL-COOH (400 MHz, CDCl <sub>3</sub> ). ....                                                                                                                             | 4 |
| Figure S4. <sup>13</sup> C NMR spectra of: modified polyester diols: A) HOOC-PCL-COOH and B) HOOC-PLA-COOH (400 MHz, CDCl <sub>3</sub> ). ....                                                                                                                               | 5 |
| Figure S5. SEC curves of starting and modified polyester diols (CH <sub>2</sub> Cl <sub>2</sub> ).....                                                                                                                                                                       | 6 |
| Figure S6. <sup>1</sup> H NMR spectrum of the soluble fraction of: A) PCL- <i>l</i> -PiPOx and B) PLA- <i>l</i> -PiPOx (400 MHz, CDCl <sub>3</sub> ).....                                                                                                                    | 7 |
| Figure S7. The mechanism for adduct formation with the ester-amide structure obtained by ring-opening oxazoline with a reagent containing carboxyl group. ....                                                                                                               | 7 |
| Figure S8. Physical appearance of: A) as-prepared and B) dried (after extraction) PLA <sub>3000</sub> - <i>l</i> -PiPOx-2 and PCL <sub>3000</sub> - <i>l</i> -PiPOx-2 networks.....                                                                                          | 8 |
| Figure S9. Physical appearance of: A) PLA <sub>3000</sub> - <i>l</i> -PiPOx-2 and PCL <sub>3000</sub> - <i>l</i> -PiPOx-2 networks swollen in water and B) PLA <sub>3000</sub> - <i>l</i> -PiPOx-4 and PCL <sub>3000</sub> - <i>l</i> -PiPOx-4 networks swollen in DMF. .... | 8 |
| Figure S10. TGA curves of the PLA- <i>l</i> -PiPOx and PCL- <i>l</i> -PiPOx networks and starting building blocks: PiPOx, HOOC-PLA <sub>3000</sub> -COOH, HOOC-PCL <sub>3000</sub> -COOH. ....                                                                               | 9 |

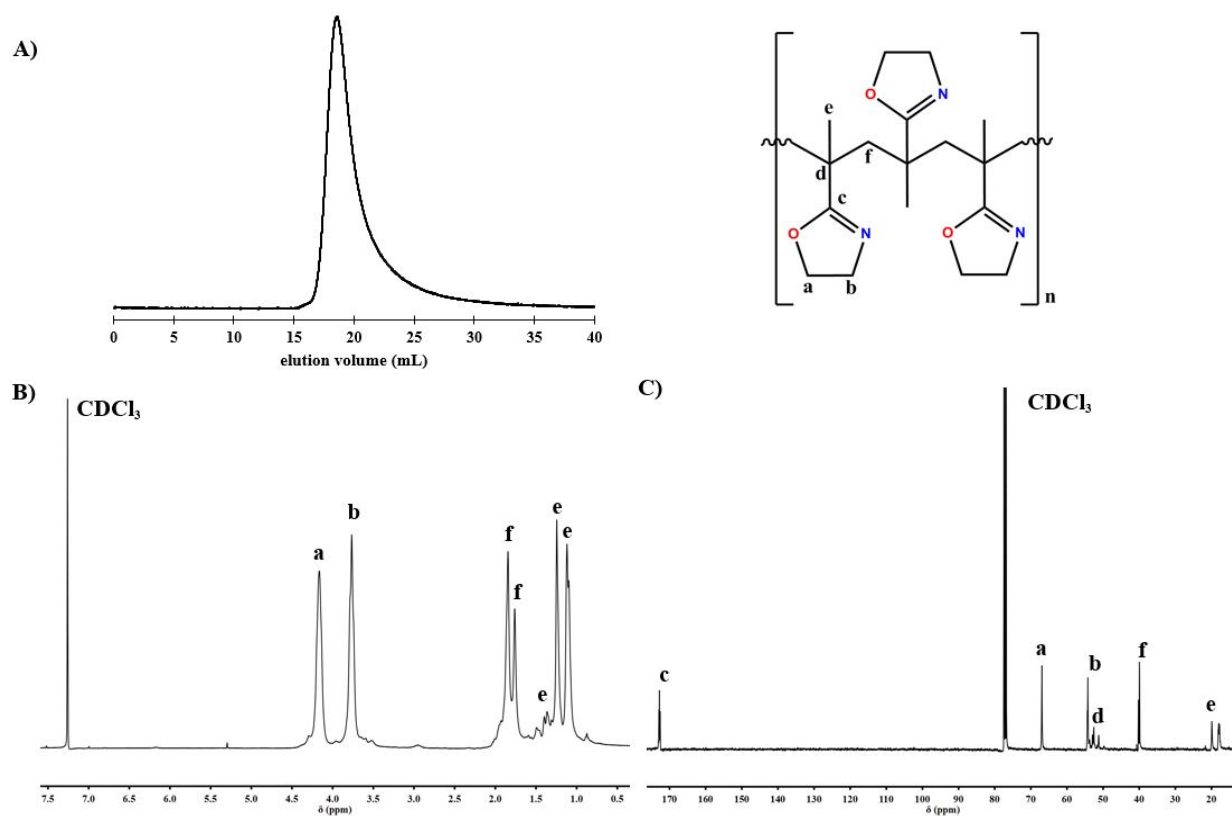

Figure S1. PiPOx characterization: A) SEC ( $\text{H}_2\text{O}$ ), B)  $^1\text{H}$  NMR and C)  $^{13}\text{C}$  NMR spectra (400 MHz,  $\text{CDCl}_3$ ).

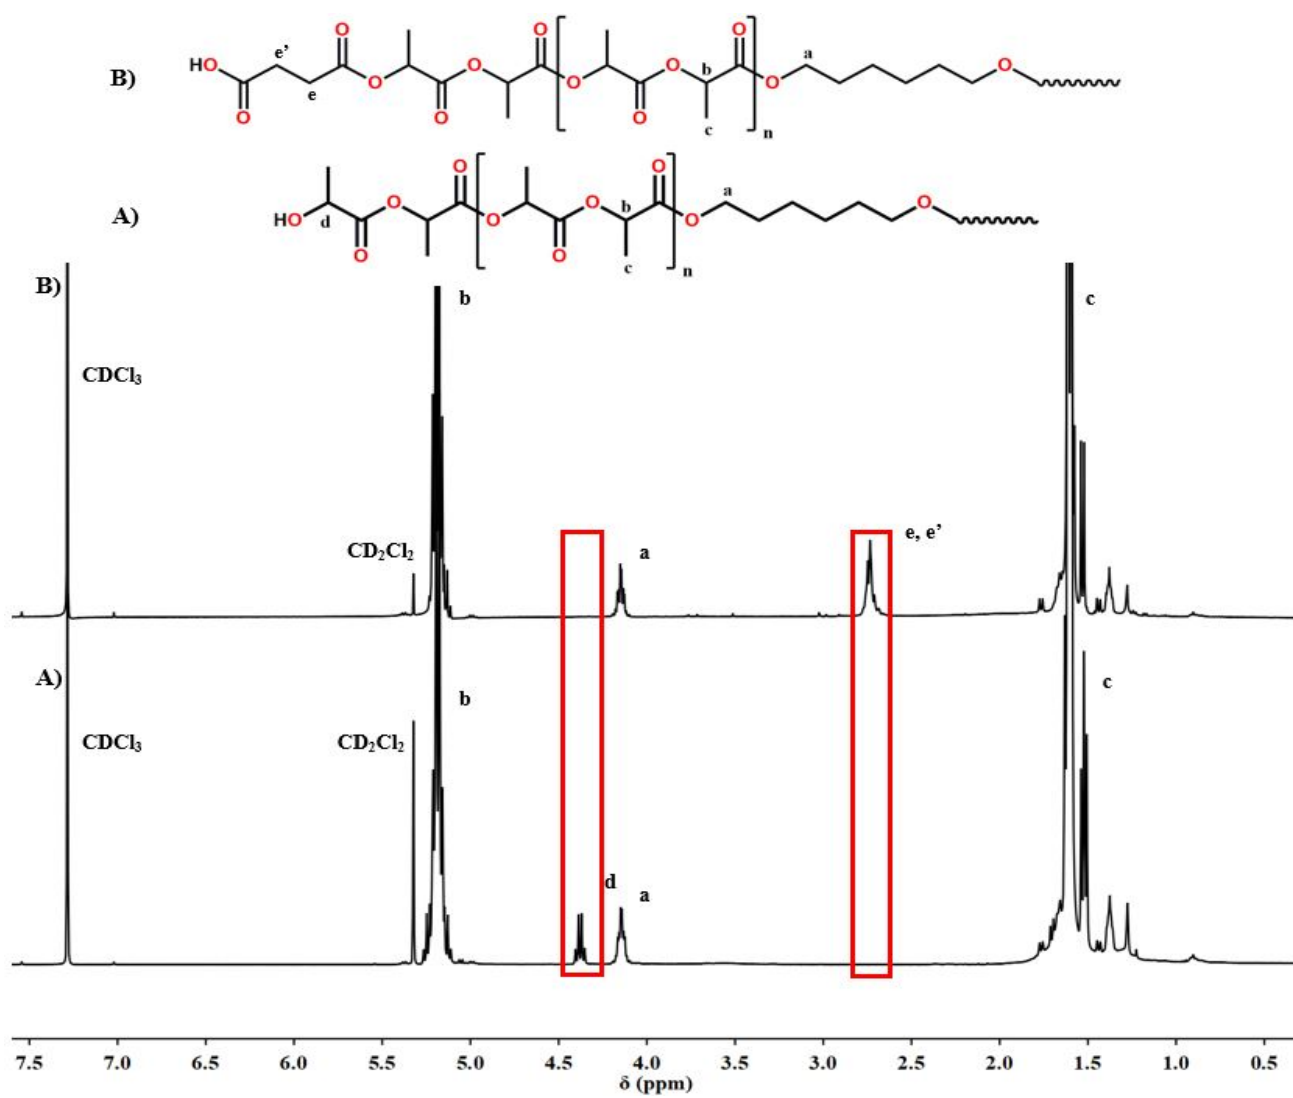

Figure S2.  $^1\text{H}$  NMR spectra of: A) starting and B) modified poly(lactide) diol: HOOC-PLA-COOH (400 MHz,  $\text{CDCl}_3$ ).

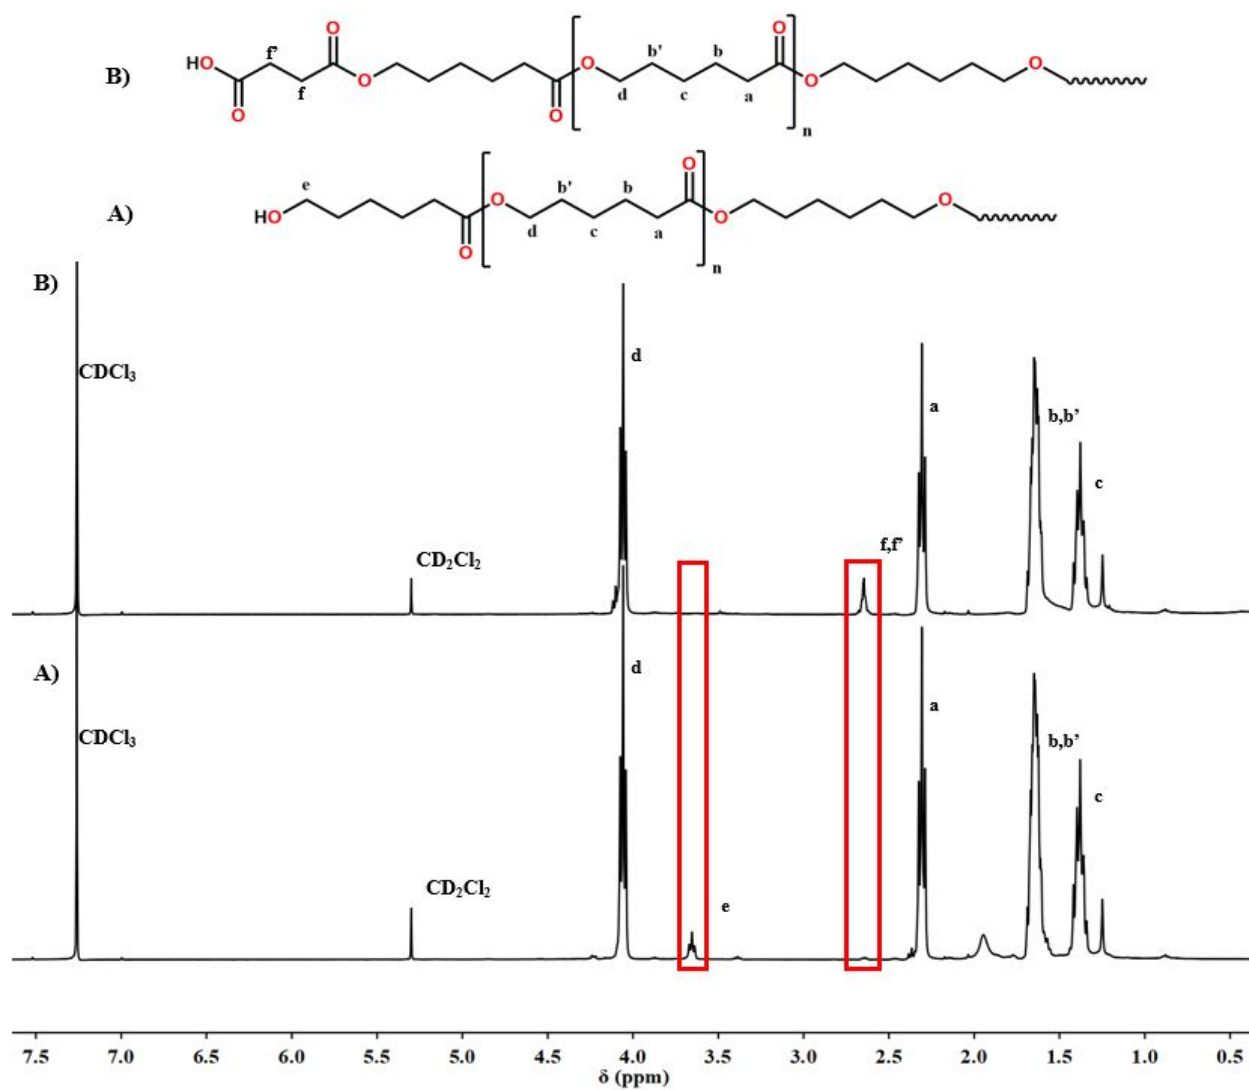

Figure S3.  $^1\text{H}$  NMR spectra of: A) starting and B) modified poly(caprolactone) diol: HOOC-PCL-COOH (400 MHz,  $\text{CDCl}_3$ ).

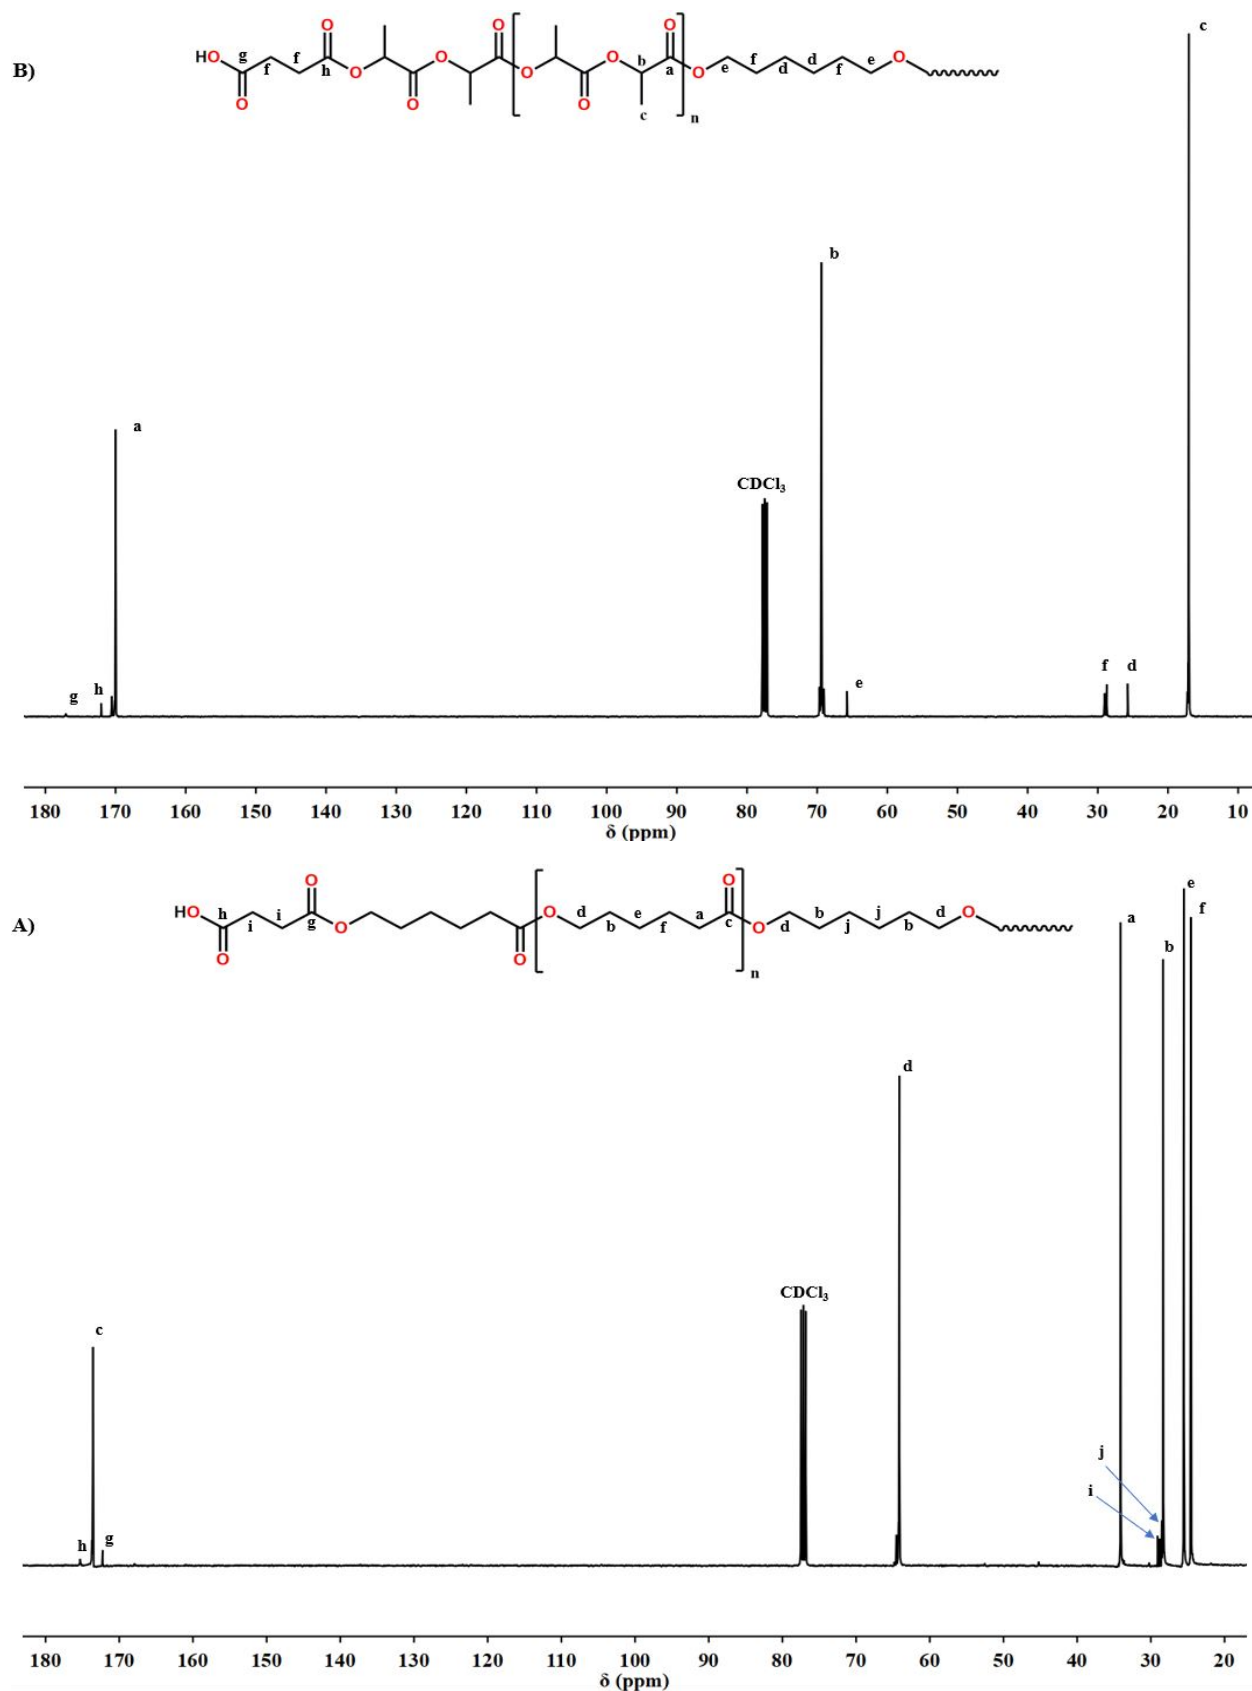

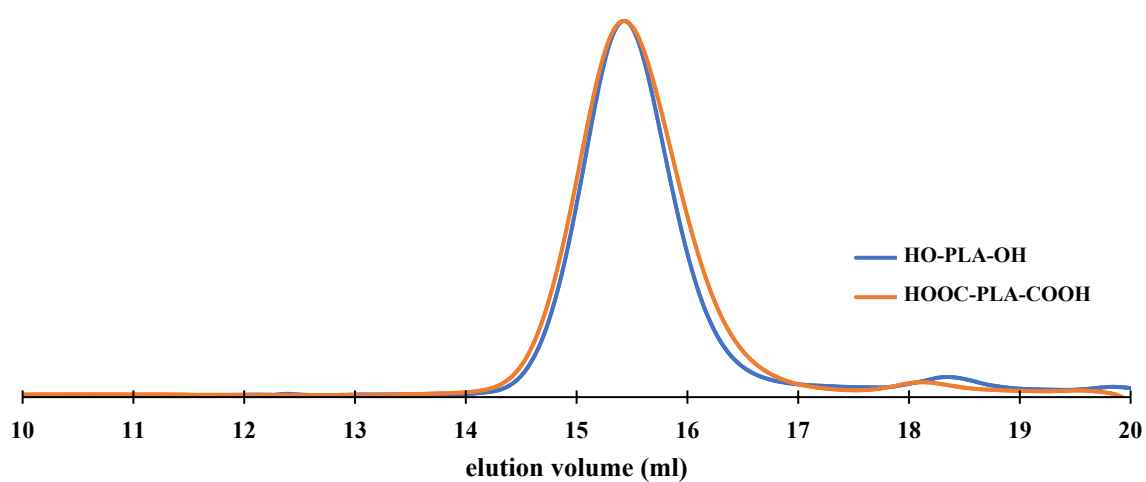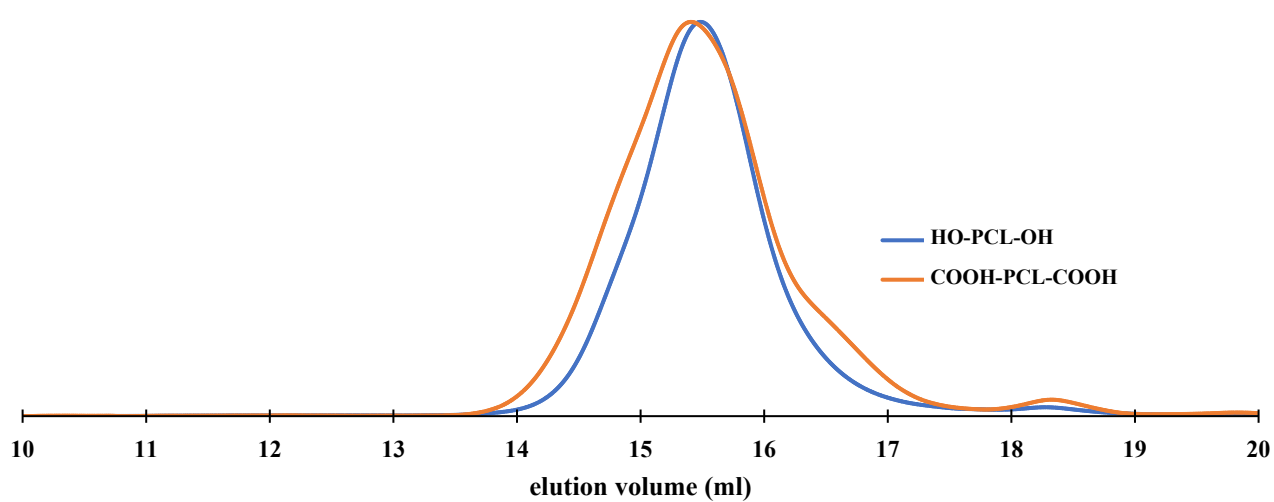

Figure S5. SEC curves of starting and modified polyester diols ( $\text{CH}_2\text{Cl}_2$ ).

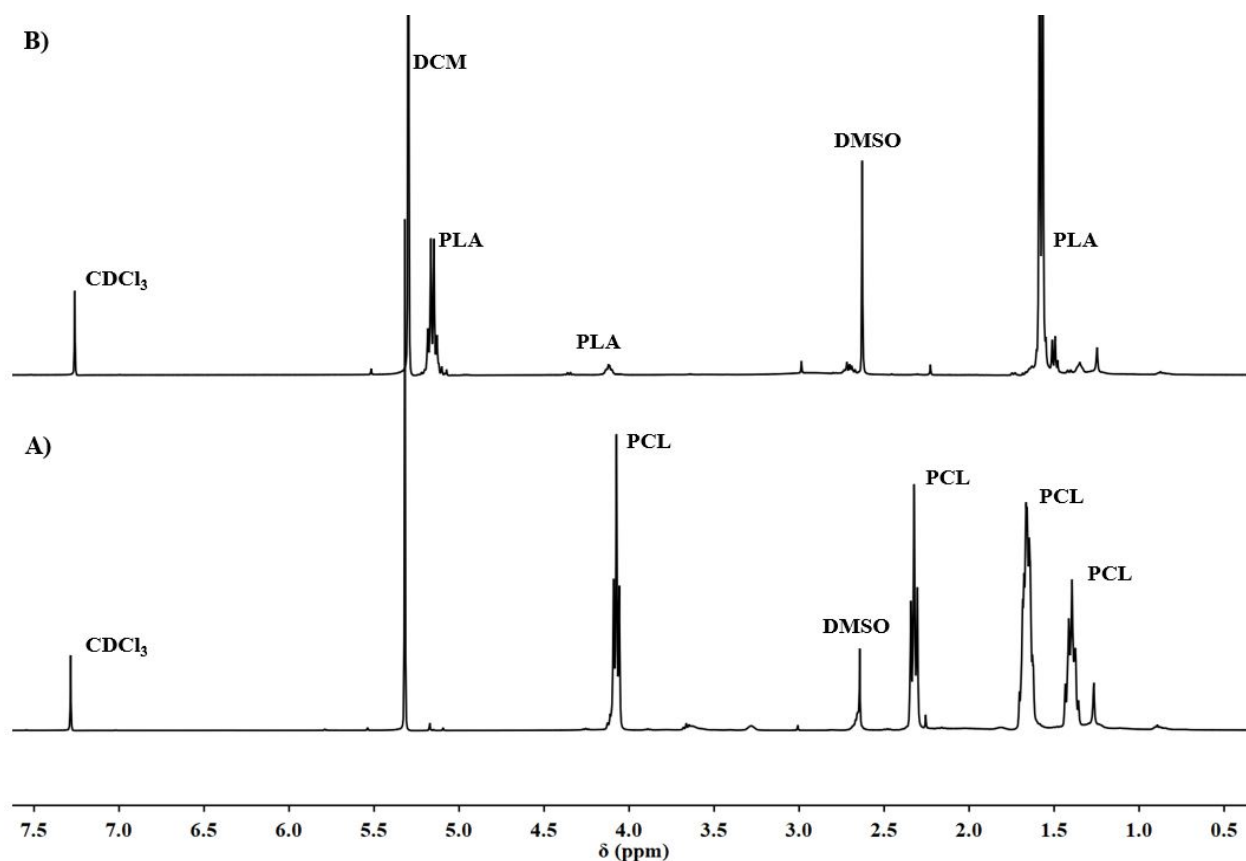

Figure S6.  $^1\text{H}$  NMR spectrum of the soluble fraction of: A) PCL-*l*-PiPOx and B) PLA-*l*-PiPOx (400 MHz,  $\text{CDCl}_3$ ).

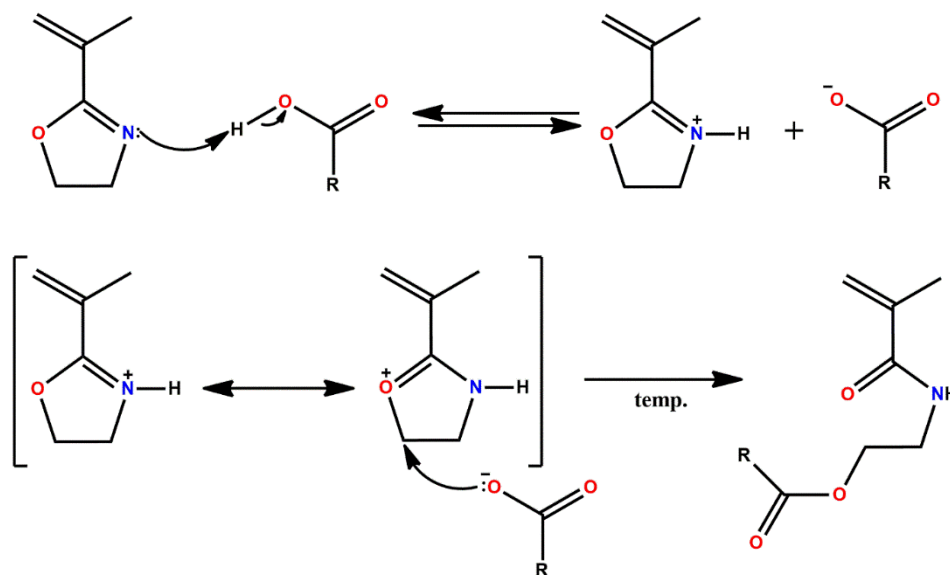

Figure S7. The mechanism for adduct formation with the ester-amide structure obtained by ring-opening oxazoline with a reagent containing carboxyl group. [Reproduced from ref. 33 with permission from Polymer Chemistry, copyright 2022]

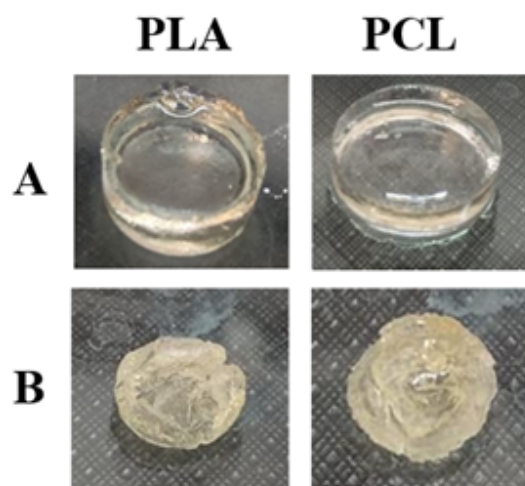

Figure S8. Physical appearance of: A) as-prepared and B) dried (after extraction)  $\text{PLA}_{3000}$ -*l*-PiPOx-2 and  $\text{PCL}_{3000}$ -*l*-PiPOx-2 networks.

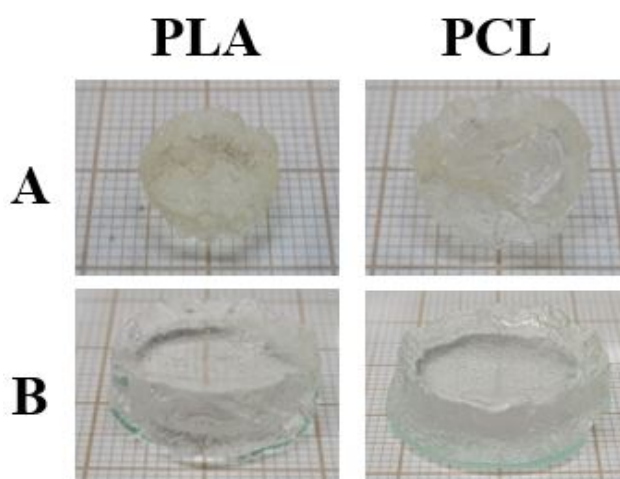

Figure S9. Physical appearance of: A)  $\text{PLA}_{3000}$ -*l*-PiPOx-2 and  $\text{PCL}_{3000}$ -*l*-PiPOx-2 networks swollen in water and B)  $\text{PLA}_{3000}$ -*l*-PiPOx-4 and  $\text{PCL}_{3000}$ -*l*-PiPOx-4 networks swollen in DMF.



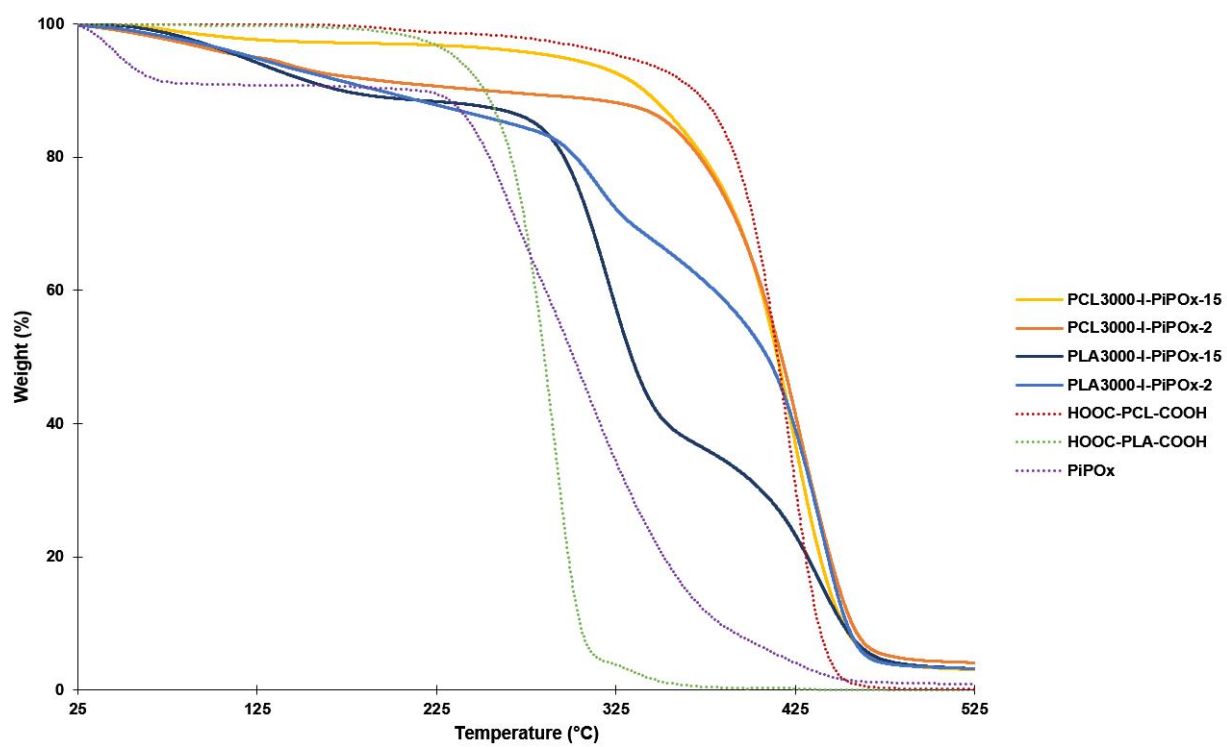

Figure S10. TGA curves of the PLA-*l*-PiPO<sub>x</sub> and PCL-*l*-PiPO<sub>x</sub> networks and starting building blocks: PiPO<sub>x</sub>, HOOC-PLA<sub>3000</sub>-COOH, HOOC-PCL<sub>3000</sub>-COOH.
